# Supplementary material for: The patient reporting and action for a safe environment (PRASE) intervention: a feasibility study
Source: Springer Nature journal article supplement (doi:10.1186/s12913-016-1919-z), 2016-11-28
Supplement: MOESM4 [file 11102246]

## Appendix 4

### Observation template

|                                        |  |
|----------------------------------------|--|
| Date of meeting                        |  |
| Meeting number<br>(e.g. first, second) |  |
| In attendance                          |  |
| Venue                                  |  |
| Start time                             |  |
| End time                               |  |
| Notes                                  |  |

- a) Notes on introduction given by PRASE team
- b) Notes on introduction given by ward staff
- c) How has feedback report been cascaded prior to meeting?
- d) Responses from staff to report (specific issues/domains)
- e) Feedback on format of report
- f) Action Plan Process – written in meeting? - written post-meeting? Responsibility for?
- g) General notes e.g. format of meeting / staff engagement etc

**\*PLEASE OBTAIN COPY OF COMPLETED ACTION PLAN\***

## Interview topic guide

*Interviews will review the action plans set as part of the intervention, & discuss:*

- General experience of the process (setting & implementing actions)
- Reflection on whether or not the action plans have been implemented
- Reasons given for these levels of implementation
- Support required by Ward teams to implement actions more successfully?  
(either from the research team, or from the hospital)

*Researcher to input a summarised rating for level of implementation for each action on their plan (yes, no, partial).*
